# Supplementary material for: The Drosophila Zinc Finger Transcription Factor Ouija Board Controls Ecdysteroid Biosynthesis through Specific Regulation of spookier
Source: PubMed Central journal article supplement (PMC4684333; doi:10.1371/journal.pgen.1005712), 2015-12-10
Supplement: pgen.1005712.s001.pdf [file pgen.1005712.s001.pdf]

**S1 Table.****Komura-Kawa et al.**

| Species names                         | Gene names     |
|---------------------------------------|----------------|
| <i>D. melanogaster</i>                | <i>CG11762</i> |
| <i>D. simulans</i>                    | <i>GD18569</i> |
| <i>D. sechellia</i>                   | <i>GM23758</i> |
| <i>D. erecta</i>                      | <i>GG12626</i> |
| <i>D. yakuba</i>                      | <i>GE25902</i> |
| <i>D. ananassae</i>                   | <i>GF18185</i> |
| <i>D. pseudoobscura pseudoobscura</i> | <i>GA11182</i> |
| <i>D. persimilis</i>                  | <i>GL12476</i> |
| <i>D. willistoni</i>                  | <i>GK11273</i> |
| <i>D. virilis</i>                     | <i>GJ22678</i> |
| <i>D. mojavensis</i>                  | <i>GI22393</i> |
| <i>D. grimshawi</i>                   | <i>GH18576</i> |
