# Supplementary material for: The Drosophila Zinc Finger Transcription Factor Ouija Board Controls Ecdysteroid Biosynthesis through Specific Regulation of spookier
Source: PubMed Central journal article supplement (PMC4684333; doi:10.1371/journal.pgen.1005712), 2015-12-10
Supplement: pgen.1005712.s002.pdf [file pgen.1005712.s002.pdf]

**S2 Table.**

**Komura-Kawa et al.**

| The presence of <i>UAS-spo</i> transgenes | Number of 3rd instar of<br><i>UAS-dicer/+;</i><br><i>p<sub>h</sub>m-GAL4#22/UAS-spok-IR</i> |
|-------------------------------------------|---------------------------------------------------------------------------------------------|
| +                                         | 41 (34)                                                                                     |
| -                                         | 0 (57)                                                                                      |
