# Supplementary material for: The Drosophila Zinc Finger Transcription Factor Ouija Board Controls Ecdysteroid Biosynthesis through Specific Regulation of spookier
Source: PubMed Central journal article supplement (PMC4684333; doi:10.1371/journal.pgen.1005712), 2015-12-10

**S1 Fig.**

**Komura-Kawa et al.**

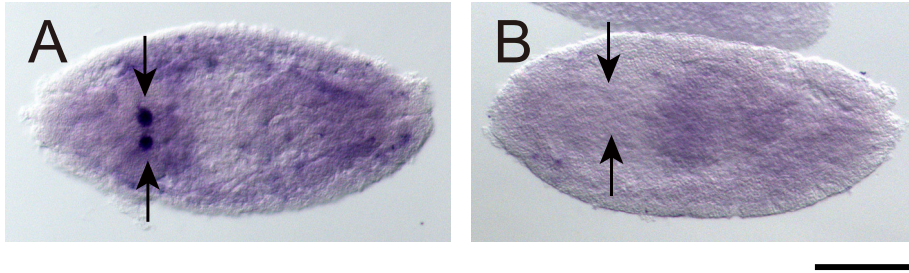

Supplement: pgen.1005712.s004.pdf [file pgen.1005712.s004.pdf]
