# Supplementary material for: The Drosophila Zinc Finger Transcription Factor Ouija Board Controls Ecdysteroid Biosynthesis through Specific Regulation of spookier
Source: PubMed Central journal article supplement (PMC4684333; doi:10.1371/journal.pgen.1005712), 2015-12-10

S6 Fig.

Komura-Kawa et al.

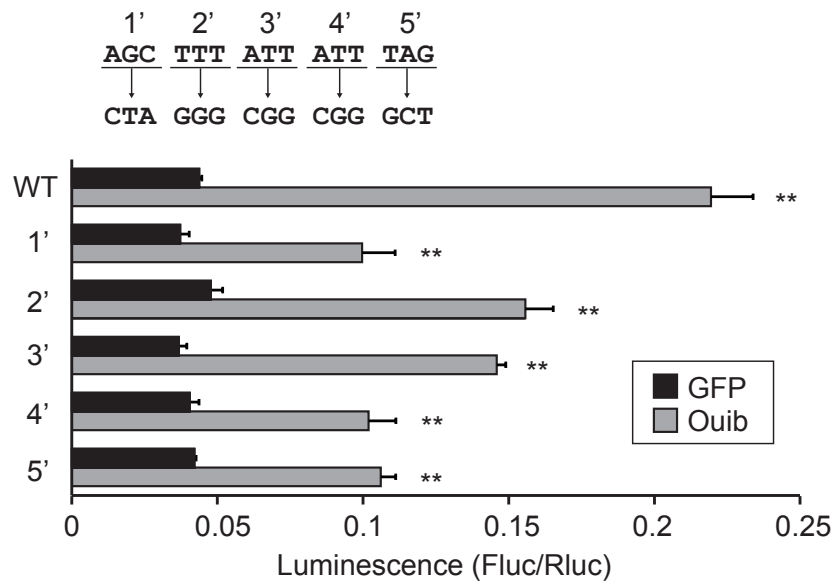

Supplement: pgen.1005712.s009.pdf [file pgen.1005712.s009.pdf]
