# Supplementary material for: The Drosophila Zinc Finger Transcription Factor Ouija Board Controls Ecdysteroid Biosynthesis through Specific Regulation of spookier
Source: PubMed Central journal article supplement (PMC4684333; doi:10.1371/journal.pgen.1005712), 2015-12-10
Supplement: pgen.1005712.s010.pdf [file pgen.1005712.s010.pdf]

S7 Fig.

Komura-Kawa et al.

|                          |      |                           |      |         |
|--------------------------|------|---------------------------|------|---------|
| <i>melanogaster</i> (S)  | -166 | AGCTTTATTATTAG            | -152 |         |
| <i>simulans-1</i> (S)    | -451 | AGCTTT <b>CGACTTT</b> CG  | -437 | (10/15) |
| <i>simulans-2</i> (S)    | -906 | AGCTT <b>CTATATT</b> TGG  | -892 | (11/15) |
| <i>simulans-3</i> (S)    | -561 | AGCA <b>TTAAT</b> CACTTG  | -547 | (9/15)  |
| <i>sechellia</i> (S)     | -451 | AGCTTT <b>CGACTTT</b> CG  | -437 | (10/15) |
| <i>erecta</i> (S)        | -203 | AGCTTT <b>TATGA</b> ATTAG | -189 | (13/15) |
| <i>yakuba</i> (S)        | -217 | AGCTTTATTATTAG            | -203 | (15/15) |
| <i>ananassae</i> (S)     | -97  | AGCTTT <b>TATAGTT</b> AG  | -83  | (11/15) |
| <i>pseudoobscura</i> (S) | -114 | AGCTTT <b>GTCGCTG</b> AG  | -100 | (10/15) |
| <i>persimilis</i> (S)    | -114 | AGCTTT <b>GTCGCTG</b> AG  | -100 | (10/15) |
| <i>willistoni</i> (S)    | -395 | CCCTTT <b>AAAATTT</b> AT  | -381 | (10/15) |
| <i>mojavensis</i> (D)    | -721 | AGCTTT <b>GTTAAATTT</b>   | -707 | (10/15) |
| <i>grimshawi</i> (D)     | -846 | AACATT <b>ATAATTG</b> CG  | -832 | (8/15)  |
| <i>virilis</i> (D)       | -419 | AATA <b>TTTTT</b> ATTAG   | -405 | (10/15) |
